# Supplementary material for: Optimizing a twin-chamber system for direct ozone production rate measurement
Source: Copernicus journal article supplement (doi:10.5194/amt-2023-192), 2023-09-07
Supplement: Supplementary file 1 [file amt-2023-192-supplement.pdf]

1 *Supplement of*

2 **Optimizing a twin-chamber system for direct ozone production rate**  
3 **measurement**

4 Yaru Wang<sup>1#</sup>, Yi Chen<sup>2#</sup>, Suzhen Chi<sup>1#</sup>, Jianshu Wang<sup>1</sup>, Chong Zhang<sup>1</sup>, Weixiong Zhao<sup>3</sup>, Weili Lin<sup>2</sup>,  
5 Chunxiang Ye<sup>1\*</sup>

6 <sup>1</sup>State Key Joint Laboratory for Environmental Simulation and Pollution Control, Center for Environment and Health, and  
7 College of Environmental Sciences and Engineering, Peking University, Beijing, 100871, China.

8 <sup>2</sup>Key Laboratory of Ecology and Environment in Minority Areas (Minzu University of China), National Ethnic Affairs  
9 Commission, Beijing, 100081, China.

10 <sup>3</sup>Laboratory of Atmospheric Physico-Chemistry, Chinese Academy of Sciences Hefei Institutes of Physical Science Anhui  
11 Institute of Optics and Fine Mechanics, Chinese Academy of Sciences, Hefei, 230031, Anhui, China.

12

13 <sup>#</sup>Yaru Wang, Yi Chen and Suzhen Chi contribute equally to this work.

14 <sup>\*</sup>Correspondence to: Chunxiang Ye (c.ye@pku.edu.cn)

15

16

17

18

19

20

21

22

23

24

25

26

27

28

29

30

31

32

### 33 S1. Design of Mea-OPR system

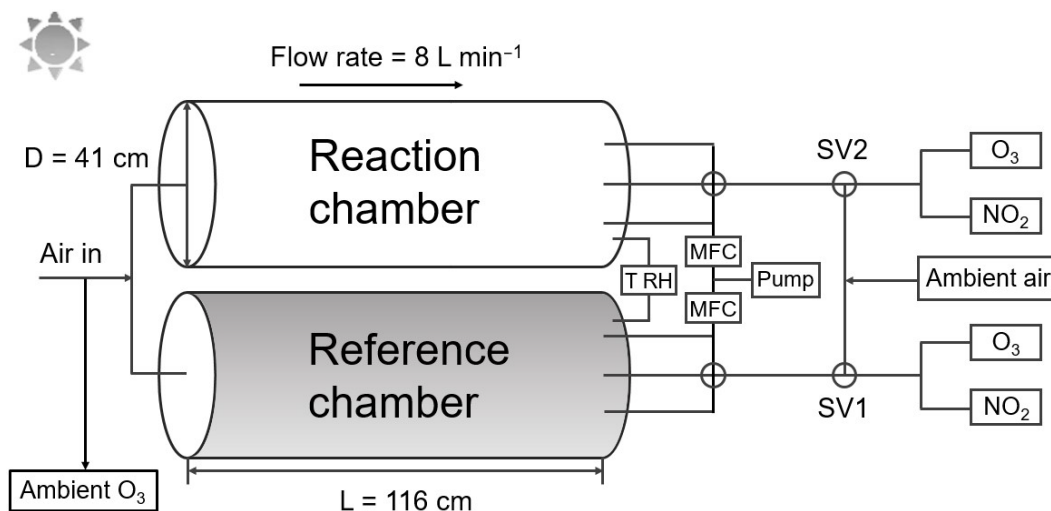

34

35 **Figure S1: Schematic of ozone production rate measurement system, Mea-OPR. SV: solenoid valve. MFC: mass flow controller.**

36 Design improvement of Mea-OPR system has lower  $O_3$  uptake coefficient of  $8.12 \times 10^{-9}$ , relative to  $7.11 \times 10^{-8}$  in quartz  
37 chambers (Sklaveniti et al., 2018). Mea-OPR also has smaller S/V ratio ( $9.8 \text{ m}^{-1}$ ) compared to the smallest value published in  
38 literature,  $18 \text{ m}^{-1}$  (Baier et al., 2015). Both help to reduce  $O_x$  uptake. Meanwhile, Mea-OPR has more flexible flow rate range  
39 ( $5\text{--}20 \text{ L min}^{-1}$ ) owing to its larger volume (153 L) relative to the largest value (26.9 L) published in literature (Baier et al.,  
40 2015). Moreover, Mea-OPR has longer residence time (up to 30 min) compared to the longest value of 20.5 min published in  
41 literature (Sadanaga et al., 2017).

42

43 S2. Characterization of Mea-OPR system

44 S2.1 Photochemical conditions in both chambers

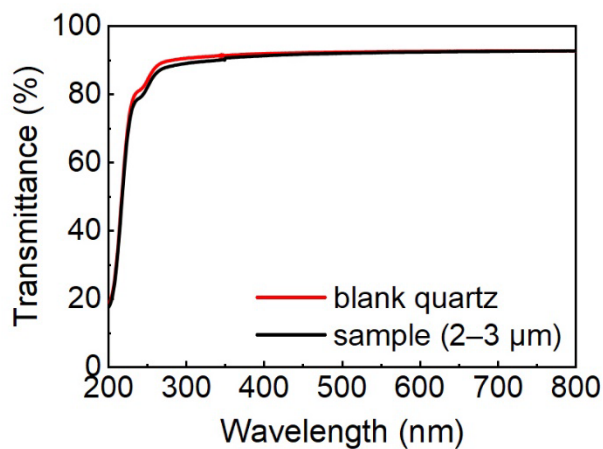

45

46 Figure S2: Detected light transmittances for blank quartz and quartz flakes coated with 2–3 μm thick Teflon film (as indicated by  
47 sample). For light with wavelength above 290 nm, light transmittance of blank and Teflon-coated quartz could reach above 88%.

48

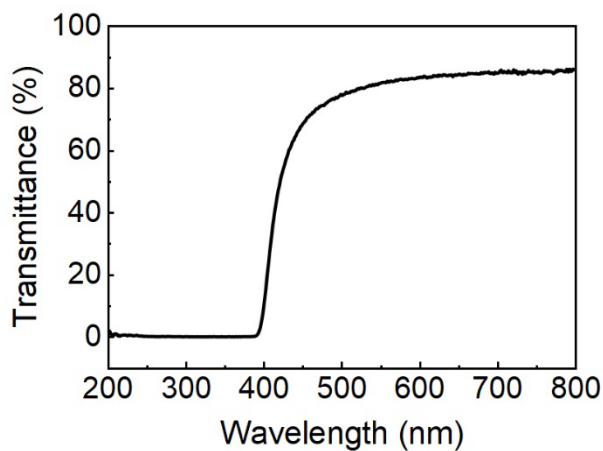

49

50 Figure S3: Light transmittance of UV filter film (PEI, 0.25 mm thick). Light transmittance is less than 50% at wavelength below 420  
51 nm and approximately zero at wavelength below 390 nm.

52

53

54

55

56

57

58 **Table S1. Comparison of photolysis rate constants of different species in the ambient, reaction chamber, and reference chamber.**

|                         | Ambient               | Reaction              | Reference             | Rea/Amb | Ref/Amb |
|-------------------------|-----------------------|-----------------------|-----------------------|---------|---------|
| $j(\text{NO}_2)$        | $7.55 \times 10^{-3}$ | $7.16 \times 10^{-3}$ | $2.79 \times 10^{-4}$ | 0.95    | 0.04    |
| $j(\text{O}^1\text{D})$ | $1.31 \times 10^{-5}$ | $1.26 \times 10^{-5}$ | $6.75 \times 10^{-7}$ | 0.96    | 0.05    |
| $j(\text{HONO})$        | $1.28 \times 10^{-3}$ | $1.21 \times 10^{-3}$ | $3.98 \times 10^{-5}$ | 0.95    | 0.03    |
| $j(\text{HCHO\_M})$     | $3.39 \times 10^{-5}$ | $3.20 \times 10^{-5}$ | $1.09 \times 10^{-6}$ | 0.94    | 0.03    |
| $j(\text{HCHO\_R})$     | $2.17 \times 10^{-5}$ | $2.05 \times 10^{-5}$ | $8.07 \times 10^{-7}$ | 0.95    | 0.04    |
| $j(\text{NO}_3\_M)$     | $1.86 \times 10^{-2}$ | $1.78 \times 10^{-2}$ | $1.09 \times 10^{-2}$ | 0.96    | 0.59    |
| $j(\text{NO}_3\_R)$     | $1.53 \times 10^{-1}$ | $1.46 \times 10^{-1}$ | $7.86 \times 10^{-2}$ | 0.96    | 0.51    |

59

60 As shown by the data listed in Table S1,  $j(\text{O}^1\text{D})$  in the reaction chamber is greater than 96% of the ambient value, and  $j(\text{O}^1\text{D})$   
 61 in the reference chamber is less than 5% of the ambient value. These results show that the reaction chamber can simulate the  
 62 photochemical process of  $\text{O}_3$  ideally, while the reference chamber can suppress it.

63 **S2.2 Temperature and relative humidity in both chambers**

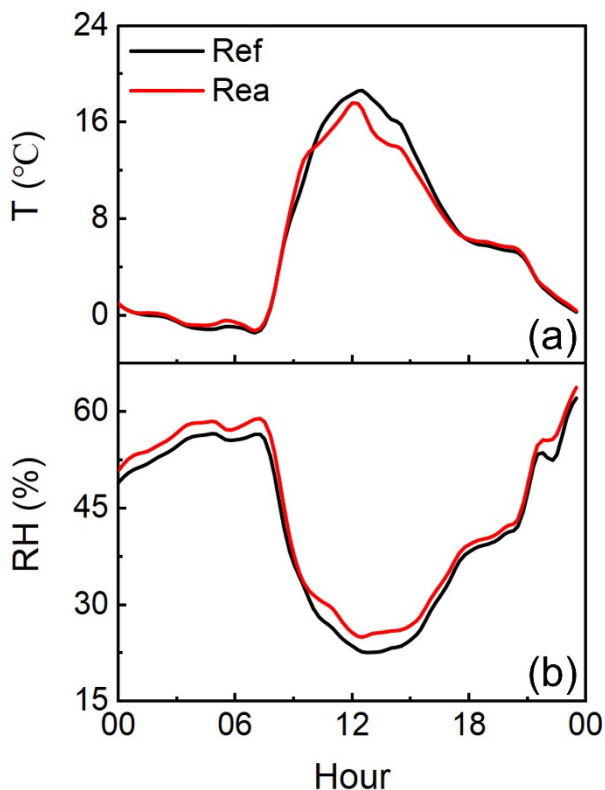

64

65 **Figure S4: Similar (a) temperature and (b) RH conditions in reaction and reference chambers on 11 February, 2022.**

### 66 S2.3 Regular calibrations for O<sub>3</sub> and NO<sub>2</sub> analyzers

67 The O<sub>3</sub> and NO<sub>2</sub> analyzers were regularly (every two weeks) calibrated using NO<sub>2</sub> (produced by gas-phase titration using  
68 NO and O<sub>3</sub>) and O<sub>3</sub> (generated by O<sub>3</sub> calibrator, Thermo Scientific, Model 49i-PS) standard gases during the field campaign  
69 and the calibrations suggested that the slope changes were less than  $\pm 0.4\%$  in O<sub>3</sub> analyzers and  $\pm 1.9\%$  in NO<sub>2</sub> analyzers (Table  
70 S2), suggesting the good stability of measurement signals for analyzers.

71 **Table S2. Calibration curves for three O<sub>3</sub> analyzers and three NO<sub>2</sub> analyzers during field campaign.**

|                       | <b>Slope</b>         | <b>Intercept</b>      | <b>R<sup>2</sup></b> |
|-----------------------|----------------------|-----------------------|----------------------|
| O <sub>3</sub> _ref   | 1.01 ( $\pm 0.004$ ) | 0.62 ( $\pm 0.047$ )  | 1                    |
| O <sub>3</sub> _rea   | 1.00 ( $\pm 0.002$ ) | -0.13 ( $\pm 0.080$ ) | 1                    |
| O <sub>3</sub> _amb   | 0.98 ( $\pm 0.001$ ) | 1.60 ( $\pm 0.032$ )  | 1                    |
| NO <sub>2</sub> _ref* | 0.75 ( $\pm 0.014$ ) |                       | 0.998                |
| NO <sub>2</sub> _rea* | 0.78 ( $\pm 0.008$ ) |                       | 0.998                |
| NO <sub>2</sub> _amb* | —                    | —                     | —                    |

72 \*Default intercept of LGR calibration curves is 0. NO<sub>2</sub>\_amb was measured by iBBCES-NO<sub>2</sub>, which is absolute measuring  
73 instrument and does not require calibration.

### 74 S2.4 Consistency checks for O<sub>3</sub> and NO<sub>2</sub> between analyzers

75 Notably, in addition to the analyzer calibrations, parallel measurements using two sets of analyzers showed some deviation,  
76 which raised uncertainties in  $\Delta O_3$  and  $\Delta NO_2$  measurements. The consistency was checked daily under dark conditions from  
77 22:00 to 23:00 with O<sub>3</sub> and NO<sub>2</sub> analyzers directly measuring ambient air through the solenoid valve switch. The measured  
78 data were compared with the real-time ambient values obtained from the other two on-line continuous O<sub>3</sub> and NO<sub>2</sub> analyzers.  
79 After 1 month of field observation, the measured average half-hour O<sub>3</sub> (NO<sub>2</sub>) data in both chambers and the ambient air showed  
80 fairly good agreement ( $R^2 = 1$ ). The difference values between two parallel analyzers during consistency measurements are  
81 shown in Fig. S5. The difference values between two O<sub>3</sub> and two NO<sub>2</sub> analyzers,  $\Delta O_3$  and  $\Delta NO_2$ , are within the range of  $\pm 0.4$   
82 ppbv, within the instrument detection limits, indicating that the parallel measurement is reliable.

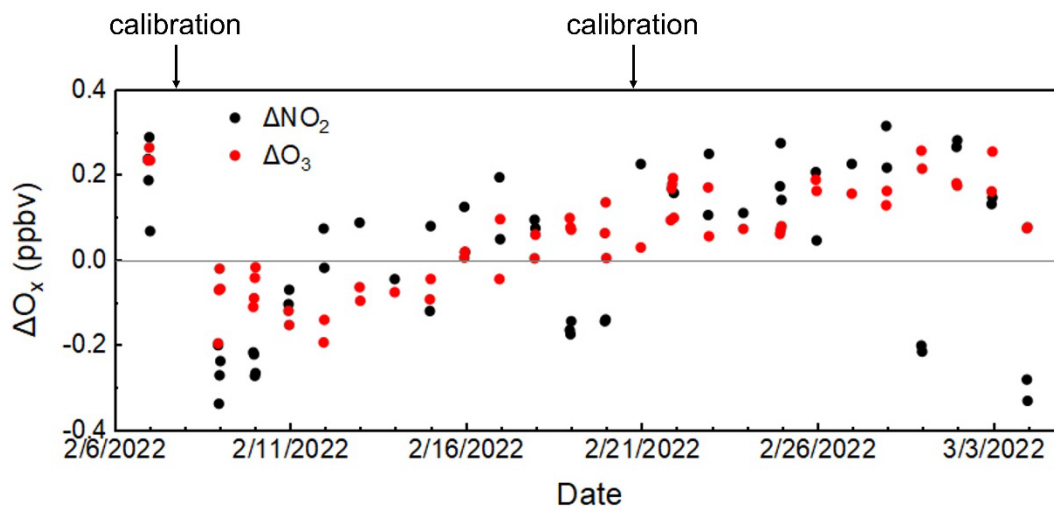

83

84 **Figure S5: Difference values of O<sub>3</sub> and NO<sub>2</sub> between two parallel analyzers, ΔO<sub>3</sub> and ΔNO<sub>2</sub>, during consistency measurements. Two**  
 85 **calibration tests were conducted on 7 and 20 February, 2022.**

86 **S2.5 Determination of gas residence time in chambers**

87 As the chamber volume and air sampling rate are 153 L and 8 L min<sup>-1</sup>, respectively, the theoretically calculated τ is 19.1  
 88 min assuming completely ideal laminar flow. The experiments to determine real τ were performed by introducing a short pulse  
 89 of CO standard gas at the inlet. The percentage change of CO concentrations at the exit is shown in Fig. S6. The real τ could  
 90 be obtained according to Eq. (S1) and (S2) (Sadanaga et al., 2017). The mean τ calculated for the reaction (τ<sub>Rea</sub>) and reference  
 91 (τ<sub>Ref</sub>) chambers are 19.7 (±0.07) min and 20.2 (±0.05) min, respectively. The average of both τ is 19.9 (±0.09) min, which  
 92 approximates the theoretical τ (19.1 min), indicating the air passing the chambers can be treated as an approaching laminar  
 93 flow.

94 
$$E(\tau) = \frac{C(\tau)}{\int_0^{\infty} C(\tau) d\tau} \quad (S1)$$

95 
$$\tau = \int_0^{\infty} \tau E(\tau) d\tau \quad (S2)$$

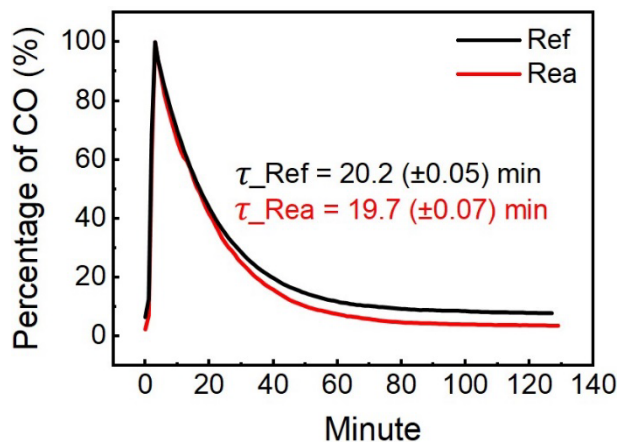

96  
97 **Figure S6: Percentage change of CO concentrations during residence time experiments.**

98 **S2.6 Condition experiments to characterize wall effect**

99 During the zero-NO<sub>x</sub>-and-high-O<sub>3</sub> experiment, a high concentration of O<sub>3</sub> (1 ppmv) of approximately 2.5 L min<sup>-1</sup> was  
100 produced by an O<sub>3</sub> generator (Thermo Scientific, Model 49i-PS) and diluted by zero air to reach the overall flow rate of 17.5  
101 L min<sup>-1</sup> and O<sub>3</sub> concentration of 113.0 ppbv before entering both chambers. In addition to O<sub>3</sub> and NO<sub>2</sub>, measurements of NO  
102 (Thermo Scientific, Model 42i), CO (Thermo Scientific, Model 48i) and HONO (long-path absorption photometer, LOPAP,  
103 homemade) in the chambers were also equipped during the control experiment. 0.5 ppmv CO (impurity in the zero air) and  
104 1.05 ppbv NO<sub>x</sub> (chamber source of NO<sub>x</sub> (Zhou et al., 2003)) were still observed in the reaction chamber, so that O<sub>3</sub>  
105 photochemical production in the reaction chamber was double-checked using a photochemical box model based on the Master  
106 Chemical Mechanism (Saunders et al., 2003). Small production of O<sub>3</sub> in the reaction chamber in the control experiment could  
107 be quantified and corrected, so that O<sub>3</sub> uptake loss, ΔO<sub>3, uptake</sub>, can be obtained from the differential O<sub>3</sub> between the inlet and  
108 outlet of each chamber.

109 Uptake coefficient of O<sub>3</sub> on the wall (γ<sub>O<sub>3</sub></sub>) was then calculated in Eq. (4). Further, the uptake coefficient was associated with  
110  $j(O^1D)$  in the daytime and RH at night, and the corresponding relationship curve was fitted, which could be used to correct the  
111 O<sub>3</sub> uptake loss difference between both chambers as Mea-OPR was deployed.

112 During the 1-week HONO production experiment, HONO in the ambient and both chambers were simultaneously measured  
113 using a customized homemade LOPAP, which is characterized by wet chemical sampling and photometric detection. The  
114 detailed description of LOPAP can be found in Wang et al.(2023). Comprehensive ambient parameters concerning O<sub>3</sub>  
115 photochemistry, including  $j$  values (Metcon CCD-Spectrograph), CO (Thermo Scientific, Model 48i), NO (Thermo Scientific,  
116 Model 42i-Y), and VOCs and OVOCs (GC-MS, TH-PKU 300B, Wuhan Tianhong Instrument Co., Ltd., China), were luckily  
117 available during the 1-week HONO production experiment. Based on this, the perturbation of differential HONO between the  
118 reaction chamber and the ambient on OPR can then be evaluated using the MCM model.

119 During the 1-week HONO production experiment, the NO<sub>x</sub> in the ambient and both chambers were measured  
 120 simultaneously, and the NO<sub>x</sub> difference between the ambient and the chamber was approximated as the NO<sub>2</sub> uptake loss,  
 121  $\Delta\text{NO}_{2,\text{uptake}}$ . Therefore, the NO<sub>2</sub> uptake coefficient in the chambers,  $\gamma_{\text{NO}_2}$ , can be calculated referring to Eq. (S3), wherein  
 122  $\text{NO}_{2,\text{amb}}$  represents the ambient NO<sub>2</sub> concentration in ppbv.  $\omega_{\text{NO}_2}$  represents mean molecular velocity of NO<sub>2</sub> in m s<sup>-1</sup>.

$$123 \gamma_{\text{NO}_2} = \frac{4 \times \Delta\text{NO}_{2,\text{uptake}}}{\text{NO}_{2,\text{amb}} \times \omega_{\text{NO}_2} \times \tau \times S/V} \quad (\text{S3})$$

124 **Table S3. Comparison of uptake losses of O<sub>3</sub> and NO<sub>2</sub> on quartz and Teflon coating quartz surfaces. Notably, uptake coefficients of**  
 125 **O<sub>3</sub> ( $\gamma_{\text{O}_3}$ ) and NO<sub>2</sub> ( $\gamma_{\text{NO}_2}$ ) were obtained using Eq. (4) and (S3), respectively. Reference data were from two recently published papers:**  
 126 **Sklaveniti et al., 2018 and Sadanaga et al., 2017.**

| Material of chamber       | Diameter (cm) | Length (cm) | Flow rate (L min <sup>-1</sup> ) | Residence time (min) | $\gamma_{\text{O}_3}^*$ | $\gamma_{\text{NO}_2}^*$ | Reference                 |
|---------------------------|---------------|-------------|----------------------------------|----------------------|-------------------------|--------------------------|---------------------------|
| Quartz                    | 14            | 70          | 2.25                             | 4.52                 | $7.11 \times 10^{-8}$   | $6.98 \times 10^{-8}$    | (Sklaveniti et al., 2018) |
| Quartz coated with Teflon | 17.1          | 50          | 0.543                            | 20.5                 | $5.17 \times 10^{-9}$   | $8.09 \times 10^{-9}$    | (Sadanaga et al., 2017)   |

127 \*Uptake coefficients were measured under dark conditions.

## 128 MCM model construction

129 O<sub>3</sub> production in above zero-NO<sub>x</sub>-and-high-O<sub>3</sub> experiment and the O<sub>3</sub> production difference between the reaction chamber  
 130 and the ambient from the 1-week HONO production experiment can be simulated using the MCM model. In the zero-NO<sub>x</sub>-  
 131 and-high-O<sub>3</sub> experiment, the model was constrained with the measured parameters concerning O<sub>3</sub> photochemistry, including  
 132 CO, HONO, O<sub>3</sub>, NO, NO<sub>2</sub>,  $j$  values, temperature and H<sub>2</sub>O. Only 48 gas-phase inorganic reactions extracted from the website  
 133 of Leeds University (MCM v3.3.1, <http://mcm.leeds.ac.uk/MCM>) were included in the chemical mechanism to mimic the O<sub>3</sub>  
 134 photochemistry in the zero air. The time resolution was set as 15 min in the MCM model. Photochemical production rate of  
 135 O<sub>3</sub> in reaction chamber by MCM simulation during condition experiment of O<sub>3</sub> uptake is shown in Fig. S7.

136 To simulate O<sub>3</sub> photochemistry in the 1-week HONO production experiment, our preliminary model was constrained by  
 137 measurements of CO, HONO, O<sub>3</sub>, NO, NO<sub>2</sub>,  $j$  values, temperature, H<sub>2</sub>O, and individual VOC/OVOC species measured using  
 138 GC-MS at a 1-hour time resolution. For the MCM model, the time resolution was set at 1 h. The preliminary model showed  
 139 that the sum of  $k_{\text{OH}}$  contributed by NO<sub>x</sub>, O<sub>3</sub>, CO, VOCs, OVOCs, and model intermediates was less than the measured  $k_{\text{OH}}$   
 140 (LFP-FRS, AIOFM), i.e.,  $k_{\text{OH}}$  was missing. The detailed description of  $k_{\text{OH}}$  measurement can be found in Wei et al.(2020). An  
 141 additional formaldehyde (HCHO) and thus HCHO+OH reaction was further included in our box model to represent the missing  
 142  $k_{\text{OH}}$ . Based on such simulation, O<sub>3</sub> production in the ambient and the reaction chamber can be calculated and compared.



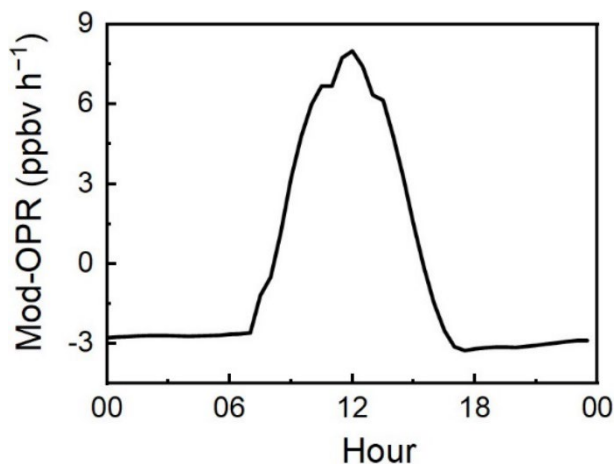

143

144 **Figure S7: Photochemical production rate of O<sub>3</sub> in reaction chamber by MCM simulation during condition experiment of O<sub>3</sub> uptake.**

145 **S2.7 Uncertainty calculation of Mea-OPR**

146 Mea-OPR can be calculated by Eq. (5).

147 For several calibrations of O<sub>3</sub> analyzers, the slope changes were less than ±0.4%, suggesting the good stability of O<sub>3</sub>  
 148 measurement. Therefore, we do not consider the uncertainty of O<sub>3,amb</sub> in Eq. (5). Similarly, because the uncertainty was less  
 149 than ±1% in the temperature measurement, we do not consider the uncertainty of ω calculated thereby. D is a constant, 0.41  
 150 m.

151 1. During the consistency measurement, the ratio of ΔNO<sub>2</sub> to NO<sub>2</sub>, X<sub>NO<sub>2</sub></sub>, was relatively constant at high concentrations.  
 152 Based on this ratio, the ΔNO<sub>2,inconsistent</sub> caused by the inconsistency between both analyzers during Mea-OPR measurement  
 153 can be obtained. ΔNO<sub>2,inconsistent</sub> is just the absolute uncertainty of ΔNO<sub>2</sub>, δΔNO<sub>2</sub>. Thus, the uncertainty of the ΔNO<sub>2</sub>  
 154 measurements can be obtained (Eq. S6). Similarly, the uncertainty of ΔO<sub>3</sub> measurements can be calculated (Eq. S9). When  
 155 NO<sub>2</sub> is above 10 ppbv, X<sub>NO<sub>2</sub></sub> remains constant, and the average value is 0.40%. When O<sub>3</sub> is above 5 ppbv, X<sub>O<sub>3</sub></sub> is equal to  
 156 0.17%. Notably, NO<sub>2</sub> and O<sub>3</sub> are uniformly referred to as the NO<sub>2</sub> and O<sub>3</sub> concentrations in the reference chamber.

157 
$$\Delta\text{NO}_2 = \text{NO}_{2,\text{Rea}} - \text{NO}_{2,\text{Ref}} \quad (\text{S4})$$

158 
$$\delta\Delta\text{NO}_2 = \Delta\text{NO}_{2,\text{inconsistent}} = \text{NO}_{2,\text{Ref}} \cdot X_{\text{NO}_2} \quad (\text{S5})$$

159 
$$\text{Unc}_{\Delta\text{NO}_2} = \frac{\delta\Delta\text{NO}_2}{\Delta\text{NO}_2} \quad (\text{S6})$$

160 
$$\Delta\text{O}_3 = \text{O}_{3,\text{Rea}} - \text{O}_{3,\text{Ref}} \quad (\text{S7})$$

161 
$$\delta\Delta\text{O}_3 = \Delta\text{O}_{3,\text{inconsistent}} = \text{O}_{3,\text{Ref}} \cdot X_{\text{O}_3} \quad (\text{S8})$$

162 
$$\text{Unc}_{\Delta\text{O}_3} = \frac{\delta\Delta\text{O}_3}{\Delta\text{O}_3} \quad (\text{S9})$$

163 2. The results of the gas residence time experiments revealed that the mean gas residence time ( $\tau$ ) in the chambers was 19.9  
 164 ( $\pm 0.09$ ,  $\delta\tau$ ) min and that the relative uncertainty was  $\pm 0.45\%$  (Eq. S10).

$$165 \text{ Unc}_{\tau} = \frac{\delta\tau}{\tau} = \frac{0.09}{19.9} = 0.45\% \quad (\text{S10})$$

166 3. According to the  $\text{O}_3$  uptake experiment, the fitting relation between  $\gamma_{\text{O}_3}$  in both chambers and  $j(\text{O}^1\text{D})$  were obtained (Eq.  
 167 S11 and S12). Statistically, the fitting parameters have certain uncertainty, and the uncertainty of  $\gamma_{\text{O}_3}$  obtained thereby can be  
 168 calculated using Eqs. (S13)–(S16).

$$169 \gamma_{\text{Ref}} = a_1 \times \exp\left(-\frac{j(\text{O}^1\text{D})}{b_1}\right) + c_1 \quad (\text{S11})$$

170 where  $a_1 (\pm \delta a_1) = -5.53 \times 10^{-9} (\pm 4.83 \times 10^{-10})$ ,  $b_1 (\pm \delta b_1) = 5.41 \times 10^{-6} (\pm 1.51 \times 10^{-6})$ ,  $c_1 (\pm \delta c_1) = 1.96 \times 10^{-8} (\pm 5.50 \times 10^{-10})$ .

$$171 \gamma_{\text{Rea}} = a_2 \times \exp\left(-\frac{j(\text{O}^1\text{D})}{b_2}\right) + c_2 \quad (\text{S12})$$

172 where  $a_2 (\pm \delta a_2) = -8.21 \times 10^{-8} (\pm 7.56 \times 10^{-9})$ ,  $b_2 (\pm \delta b_2) = 9.76 \times 10^{-6} (\pm 2.12 \times 10^{-6})$ ,  $c_2 (\pm \delta c_2) = 1.10 \times 10^{-7} (\pm 8.70 \times 10^{-9})$ .

$$173 \delta\gamma_{\text{Ref}} = \sqrt{\left[ a_1^2 \cdot \exp\left(-\frac{2j(\text{O}^1\text{D})}{b_1}\right) \right] \left[ \left(\frac{\delta a_1}{a_1}\right)^2 + \left(\frac{j(\text{O}^1\text{D}) \cdot \delta b_1}{b_1^2}\right)^2 \right] + (\delta c_1)^2} \quad (\text{S13})$$

$$174 \delta\gamma_{\text{Rea}} = \sqrt{\left[ a_2^2 \cdot \exp\left(-\frac{2j(\text{O}^1\text{D})}{b_2}\right) \right] \left[ \left(\frac{\delta a_2}{a_2}\right)^2 + \left(\frac{j(\text{O}^1\text{D}) \cdot \delta b_2}{b_2^2}\right)^2 \right] + (\delta c_2)^2} \quad (\text{S14})$$

$$175 \text{ Unc}_{\gamma_{\text{Ref}}} = \frac{\delta\gamma_{\text{Ref}}}{\gamma_{\text{Ref}}} \quad (\text{S15})$$

$$176 \text{ Unc}_{\gamma_{\text{Rea}}} = \frac{\delta\gamma_{\text{Rea}}}{\gamma_{\text{Rea}}} \quad (\text{S16})$$

177 4. According to experimental measurement, the UV transmittance of the reaction chamber is 96%, and the UV transmittance  
 178 of the reference chamber is 5%. However, we do not consider the blocking effect of the system on UV when calculating Mea-  
 179 OPR, i.e.,  $\varphi_{\text{trans}} = 1$ , and the corresponding absolute uncertainty is  $-9\%$ . The uncertainty of this item can be calculated using  
 180 Eq. (S17).

$$181 \text{ Unc}_{\varphi_{\text{trans}}} = \frac{\delta\varphi_{\text{trans}}}{\varphi_{\text{trans}}} = \frac{9\%}{1} = 9\% \quad (\text{S17})$$

182 5. During the 1-week HONO production experiment,  $\Delta\text{HONO}$  was found to have a negligible effect on Mea-OPR, so we  
 183 do not consider the correction of HONO production, i.e.,  $\varphi_{\Delta\text{HONO}} = 1$ , and the corresponding absolute uncertainty is at most  
 184  $+4.5\%$ . The uncertainty of this item can be calculated using Eq. (S18).

$$185 \text{ Unc}_{\varphi_{\Delta\text{HONO}}} = \frac{\delta\varphi_{\Delta\text{HONO}}}{\varphi_{\Delta\text{HONO}}} = \frac{4.5\%}{1} = 4.5\% \quad (\text{S18})$$

186 Mea-OPR can be further divided into three parts: A, B and C, wherein

$$187 \quad A = \frac{\Delta\text{NO}_2 + \Delta\text{O}_3}{\tau} \quad (\text{S19})$$

$$188 \quad B = \frac{(\gamma_{\text{Rea}} \cdot \omega_{\text{Rea}} - \gamma_{\text{Ref}} \cdot \omega_{\text{Ref}}) \cdot \text{O}_{3,\text{amb}}}{D} \quad (\text{S20})$$

$$189 \quad C = \varphi_{\text{trans}} \cdot \varphi_{\Delta\text{HONO}} \quad (\text{S21})$$

$$190 \quad \delta A = \frac{\Delta\text{NO}_2 + \Delta\text{O}_3}{\tau} \cdot \sqrt{\frac{(\delta\Delta\text{NO}_2)^2 + (\delta\Delta\text{O}_3)^2}{(\Delta\text{NO}_2 + \Delta\text{O}_3)^2} + \left(\frac{\delta\tau}{\tau}\right)^2} \quad (\text{S22})$$

$$191 \quad \delta B = \frac{\sqrt{(\delta\gamma_{\text{Rea}} \cdot \omega_{\text{Rea}})^2 + (\delta\gamma_{\text{Ref}} \cdot \omega_{\text{Ref}})^2} \cdot \text{O}_{3,\text{amb}}}{D} \quad (\text{S23})$$

$$192 \quad \delta C = \varphi_{\text{trans}} \cdot \varphi_{\Delta\text{HONO}} \cdot \sqrt{\left(\frac{\delta\varphi_{\text{trans}}}{\varphi_{\text{trans}}}\right)^2 + \left(\frac{\delta\varphi_{\Delta\text{HONO}}}{\varphi_{\Delta\text{HONO}}}\right)^2} \quad (\text{S24})$$

193 Since  $\text{Mea-OPR} = \frac{A+B}{C}$ , the uncertainty of Mea-OPR can be calculated using Eq. (S25) and (S26) as follow:

$$194 \quad \delta\text{Mea-OPR} = \frac{A+B}{C} \cdot \sqrt{\frac{(\delta A)^2 + (\delta B)^2}{(A+B)^2} + \left(\frac{\delta C}{C}\right)^2} \quad (\text{S25})$$

$$195 \quad \text{Unc}_{\text{Mea-OPR}} = \frac{\delta\text{Mea-OPR}}{\text{Mea-OPR}} = \sqrt{\frac{(\delta A)^2 + (\delta B)^2}{(A+B)^2} + \left(\frac{\delta C}{C}\right)^2} \quad (\text{S26})$$

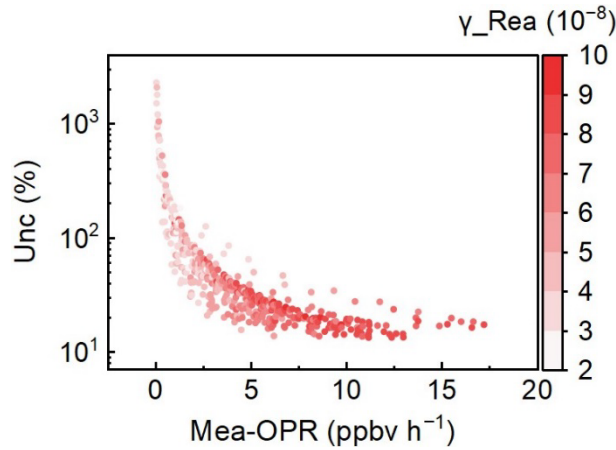

196

197 **Figure S8: Total uncertainty of Mea-OPR system under different Mea-OPR. Color represents O<sub>3</sub> uptake coefficient in reaction**  
 198 **chamber. Clearly, under the same Mea-OPR, when O<sub>3</sub> uptake coefficient decreases, corresponding uncertainty also reduces. This**  
 199 **result further indicates the importance of reducing O<sub>3</sub> uptake in chambers for accurate measurement of Mea-OPR.**

200

201

202

203 **Table S4. Uncertainties of Mea-OPR system.**

| <b>Source</b>               |               | <b>Value</b>            | <b>Uncertainty</b> |
|-----------------------------|---------------|-------------------------|--------------------|
| UV transmittance            | Ref           | 5%                      | -5%                |
|                             | Rea           | 96%                     | -4%                |
| Gas residence time          |               | 19.9 ( $\pm 0.09$ ) min | $\pm 0.45\%$       |
| Measurement of $\Delta O_x$ | $\Delta NO_2$ |                         | $\pm 3.8\%^*$      |
|                             | $\Delta O_3$  |                         | $\pm 1.1\%^*$      |
| $\gamma_{O_3}$              | Ref           |                         | $\pm 4.4\%^*$      |
|                             | Rea           |                         | $\pm 23\%^*$       |
| $\gamma_{NO_2}$             |               |                         | -                  |
| HONO production             |               |                         | $+4.5\%^*$         |
| Total                       |               |                         | $\pm 27\%^*$       |

204 <sup>\*</sup>Uncertainties of Mea-OPR evaluated during daytime. Total uncertainty represents the average uncertainty when Mea-OPR is  
205 above the detection limit ( $2.8 \text{ ppbv h}^{-1}$ ).  
206

207

208

209

210

211

212

213

214

215

216

217

218

219

220

221

222

223 **References**

- 224 Baier, B. C., Brune, W. H., Lefer, B. L., Miller, D. O., and Martins, D. K.: Direct ozone production rate measurements and  
225 their use in assessing ozone source and receptor regions for Houston in 2013, *Atmos. Environ.*, 114, 83–91,  
226 <https://doi.org/10/gnxf26>, 2015.
- 227 Sadanaga, Y., Kawasaki, S., Tanaka, Y., Kajii, Y., and Bandow, H.: New system for measuring the photochemical ozone  
228 production rate in the atmosphere, *Environ. Sci. Technol.*, 51, 2871–2878, <https://doi.org/10/f9qw59>, 2017.
- 229 Saunders, S. M., Jenkin, M. E., Derwent, R. G., and Pilling, M. J.: Protocol for the development of the Master Chemical  
230 Mechanism, MCM v3 (Part A): tropospheric degradation of non-aromatic volatile organic compounds, *Atmos. Chem. Phys.*,  
231 3, 161–180, <https://doi.org/10.5194/acp-3-161-2003>, 2003.
- 232 Sklaveniti, S., Locoge, N., Stevens, P. S., Wood, E., Kundu, S., and Dusanter, S.: Development of an instrument for direct  
233 ozone production rate measurements: measurement reliability and current limitations, *Atmos. Meas. Tech.*, 11, 741–761,  
234 <https://doi.org/10/gmttxc>, 2018.
- 235 Wang, Y., Wang, J., Wang, Y., Zhang, Y., Woodward-Massey, R., Zhang, C., Kuang, Y., Zhu, J., Shang, J., Li, X., Zeng, L.,  
236 Lin, W., and Ye, C.: Experimental and kinetic model evaluation of HONO production from surface nitrate photolysis,  
237 *Atmos. Environ.*, 296, 119568, <https://doi.org/10.1016/j.atmosenv.2022.119568>, 2023.
- 238 Wei, N., Fang, B., Zhao, W., Wang, C., Yang, N., Zhang, W., Chen, W., and Fittschen, C.: Time-Resolved Laser-Flash  
239 Photolysis Faraday Rotation Spectrometer: A new tool for total OH reactivity measurement and free radical kinetics  
240 research, *Anal. Chem.*, 92, 4334–4339, <https://doi.org/10.1021/acs.analchem.9b05117>, 2020.
- 241 Zhou, X., Gao, H., He, Y., Huang, G., Bertman, S. B., Civerolo, K., and Schwab, J.: Nitric acid photolysis on surfaces in low-  
242 NO<sub>x</sub> environments: Significant atmospheric implications, *Geophys. Res. Lett.*, 30, n/a-n/a,  
243 <https://doi.org/10.1029/2003GL018620>, 2003.

244
